# Supplementary material for: α-Catenin and Piezo1 Mediate Cell Mechanical Communication via Cell Adhesions
Source: Biology (Basel). 2024 May 19;13(5):357. doi: 10.3390/biology13050357 (PMC11118126; doi:10.3390/biology13050357)
Supplement: Supplementary file 1 [file biology-13-00357-s001.zip]

Archive with 4 entries (4 files):
- Movie 1.avi
- Movie 2.avi
- Movie 3.avi
- Supporting information_2024.05.pdf
